# Supplementary material for: First Evidence for a Role of Siglec-8 in Breast Cancer
Source: MDPI journal article supplement (doi:10.3390/ijms22042000), 2021-02-18
Supplement: s1 [file s1]

## Supplementary Information

### Tables:

**Table SI 1:** Correlation analysis (Spearman-Rho) of Siglec-8 expression (measured by IRS) with clinical and pathological parameters and the known prognostic factors Gal-7 and TA-MUC1. Significant correlations are displayed in bold. \*\*. Correlation is significant at the 0.01 level (2-tailed). \*. Correlation is significant at the 0.05 level (2-tailed). CC = correlation coefficient. IRS = immune reactivity score. NST = no special type. HER2 = human epidermal growth factor receptor. ER = estrogen receptor. PR = progesterone receptor. N = number of patients. Gal = galectin. TA-MUC1 = tumor-associated mucin-1.

|                        |                         | Siglec-8 expression (IRS) |
|------------------------|-------------------------|---------------------------|
| <b>NST vs non-NST</b>  | CC                      | <b>0.180**</b>            |
|                        | Significance (2-tailed) | 0.009                     |
|                        | N                       | 213                       |
| Biological subtype     | CC                      | 0.003                     |
|                        | Significance (2-tailed) | 0.968                     |
|                        | N                       | 226                       |
| Grading                | CC                      | 0.152                     |
|                        | Significance (2-tailed) | 0.059                     |
|                        | N                       | 156                       |
| HER2 amplification     | CC                      | 0.109                     |
|                        | Significance (2-tailed) | 0.103                     |
|                        | N                       | 224                       |
| <b>ER-status</b>       | CC                      | <b>0.147*</b>             |
|                        | Significance (2-tailed) | 0.027                     |
|                        | N                       | 226                       |
| PR-status              | CC                      | 0.110                     |
|                        | Significance (2-tailed) | 0.098                     |
|                        | N                       | 226                       |
| Tumor size (pT)        | CC                      | 0.067                     |
|                        | Significance (2-tailed) | 0.316                     |
|                        | N                       | 225                       |
| Lymph node status (pN) | CC                      | 0.028                     |
|                        | Significance (2-tailed) | 0.679                     |
|                        | N                       | 217                       |
| Age                    | CC                      | -0.078                    |
|                        | Significance (2-tailed) | 0.243                     |
|                        | N                       | 226                       |
|                        | CC                      | <b>0.298**</b>            |

|                                    |                         |               |
|------------------------------------|-------------------------|---------------|
| <b>Gal-7 IRS<br/>(cytoplasm)</b>   | Significance (2-tailed) | <0.001        |
|                                    | N                       | 212           |
| <b>TA-MUC1 IRS<br/>(cytoplasm)</b> | CC                      | <b>0.140*</b> |
|                                    | Significance (2-tailed) | 0.039         |
|                                    | N                       | 218           |
| TA-MUC1 IRS<br>(membranous)        | CC                      | 0.017         |
|                                    | Significance (2-tailed) | 0.803         |

Figures:

**Figure SI1:**

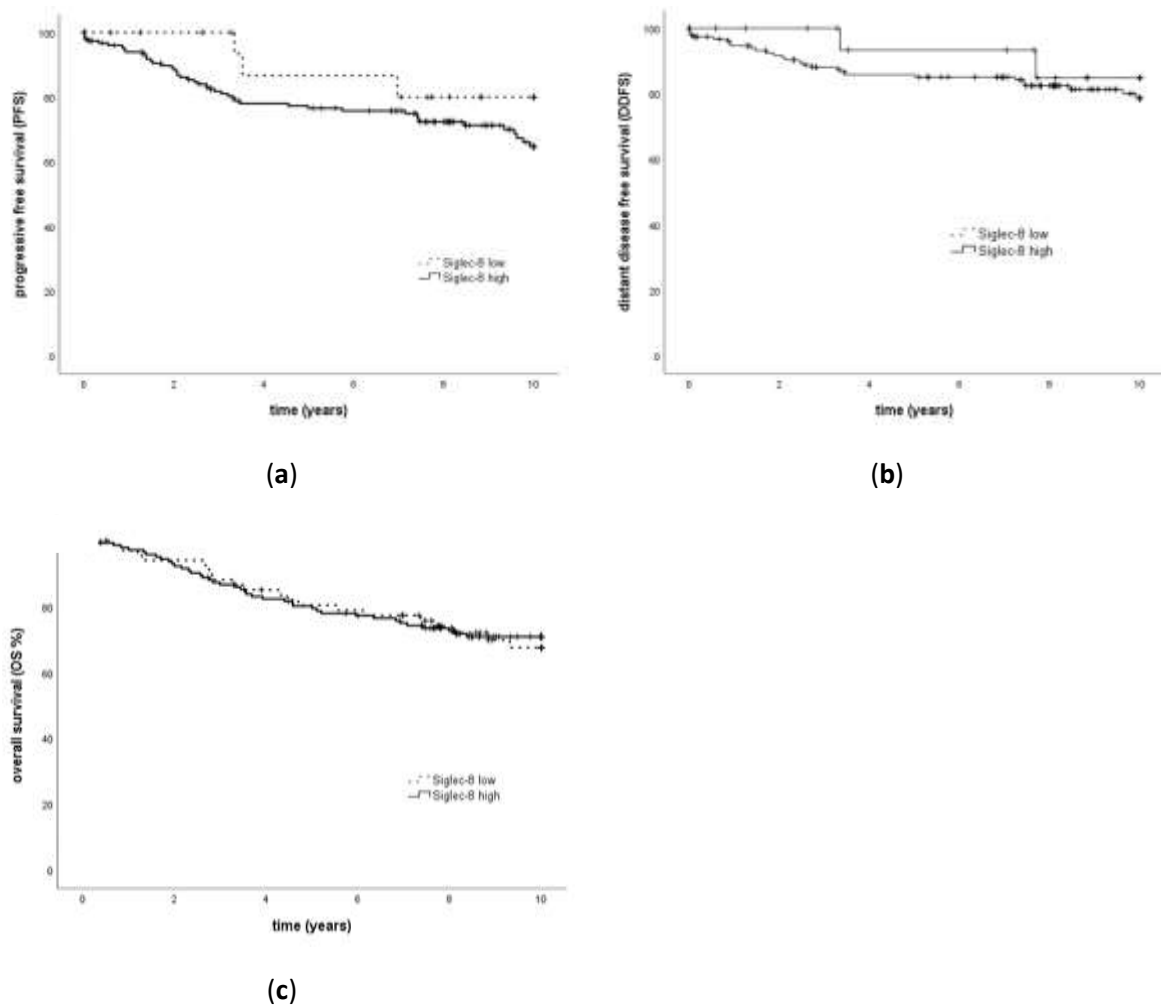

**Figure SI 1.** Association of Siglec-8 expression to the clinical outcome. Kaplan-Meier analysis of PFS ( $p = 0.971$ ) (a) and DDFS ( $p = 0.941$ ) (b) and OS ( $p = 0.850$ ) (c) in Siglec-8 high and low expressing tumors is shown. Tumors with high Siglec-8 expression show a tendentially but not significantly impaired PFS and DDFS.

**Figure SI 2:**

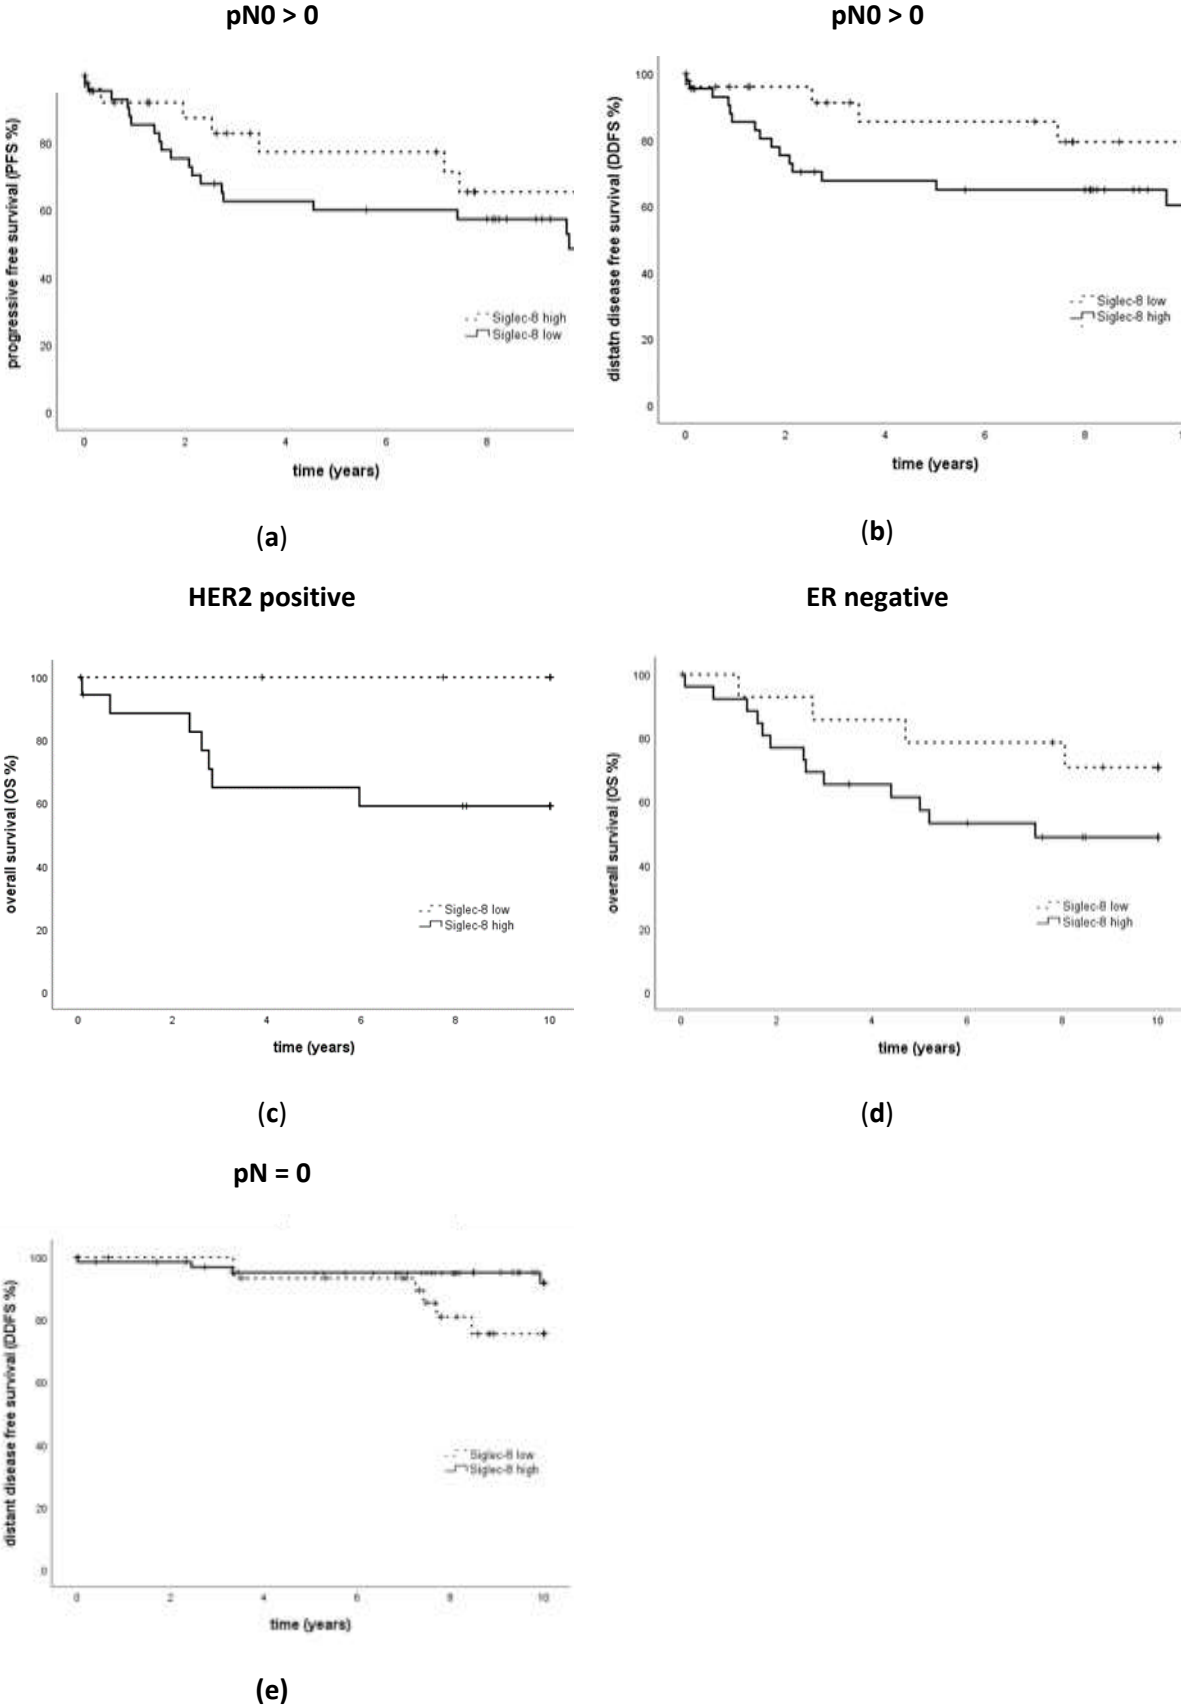

**Figure SI 2.** Associations of Siglec-8 expression to the clinical outcome in different subgroups with borderline significance.

Kaplan-Meier analysis of PFS (a, e), DDFS (b) and OS (c, d) in Siglec-8 high and low-expressing tumors with pN > 0 (a, b), pN = 0 (e), HER2+ (c) and ER- (d) is shown. In node-positive disease, high Siglec-8 expression is associated with a tendentially impaired PFS ( $p = 0.237$ , a) and DDFS ( $p = 0.117$ , b). In HER2-positive ( $p = 0.118$ , c) and ER-negative ( $p = 0.153$ , d) disease, high Siglec-8 expression is tendentially associated with an impaired OS. In contrast, in node-negative BC, high Siglec-8 expression is tendentially associated with an improved DDFS ( $p = 0.061$ , e). PFS = progression free survival, DDFS = distant disease free survival, OS = overall survival, pN = lymph node status, HER2 = human epidermal growth factor receptor-2, ER = estrogen receptor.

**Figure SI 3:**

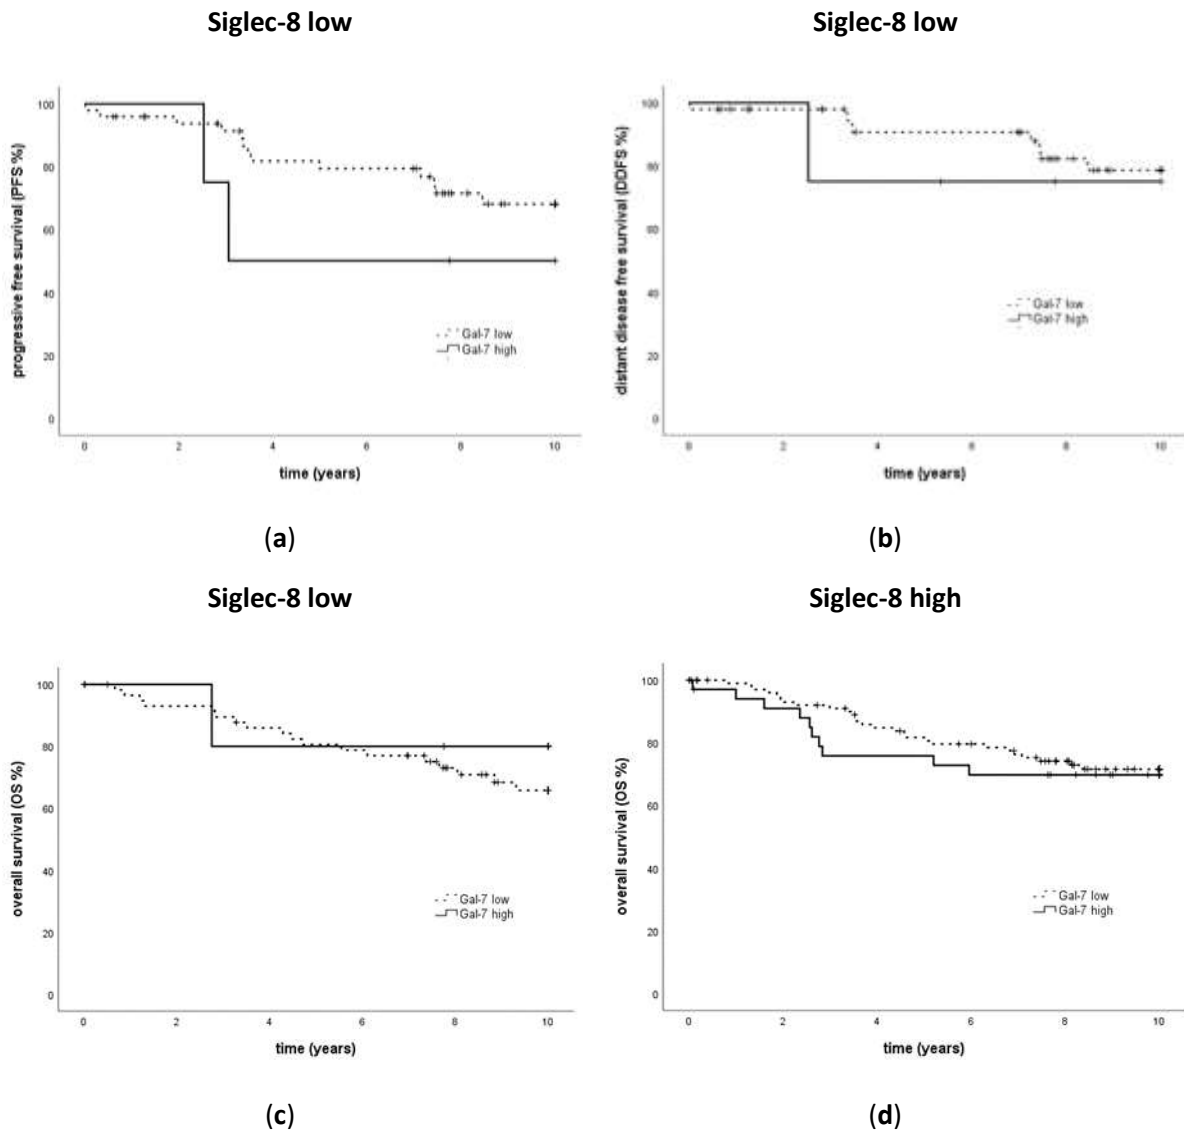

**Figure SI 3.** Not significant associations of Gal-7 expression to the clinical outcome in Siglec-8 low or Siglec-8 high subgroups.

Kaplan-Meier analysis of PFS (a) ( $p = 0.276$ ), DDFS (b) ( $p = 0.589$ ) and OS (c) ( $p = 0.632$ ) and (d) ( $p = 0.653$ ) in Gal-7 high and low-expressing tumors in Siglec-8 low-expressing (a, b, c), and Siglec-8 high-expressing tumors (d).

**Figure SI 4:**

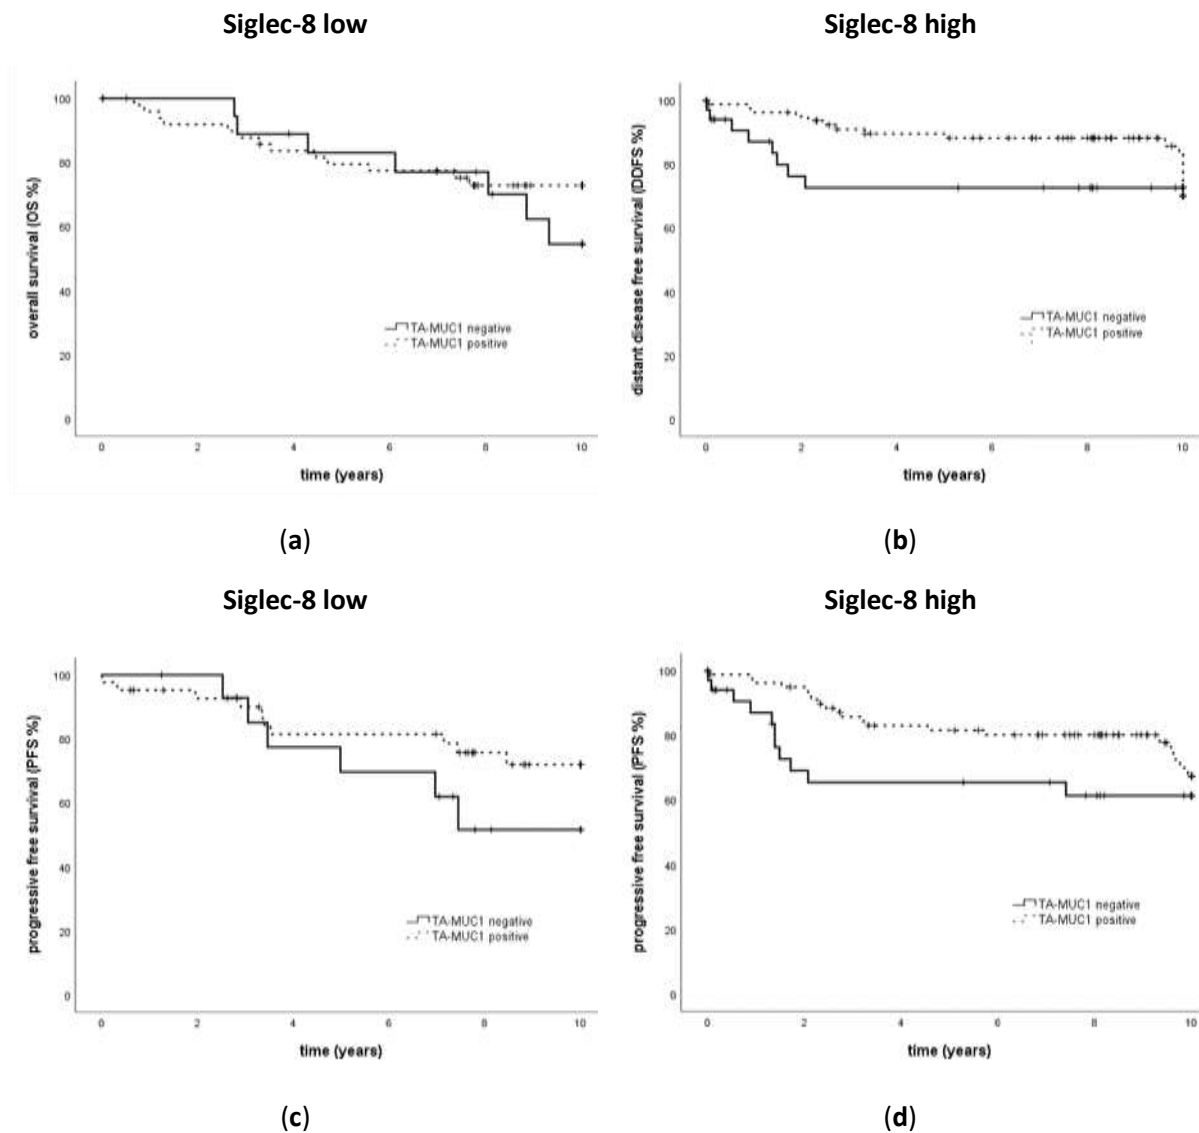

**Figure SI 4.** Not significant associations of TA-MUC1 expression to the clinical outcome in Siglec-8 low or Siglec-8 high subgroups.

Kaplan-Meier analysis of OS (a) ( $p = 0.443$ ), DDFS (b) ( $p = 0.307$ ) and PFS (c) ( $p = 0.205$ ) and (d) ( $p = 0.132$ ) in TA-MUC1-positive and negative-expressing tumors in Siglec-8 low-expressing (a, c), and Siglec-8 high expressing tumors (b, d).
